# Supplementary material
Source: PubMed Central journal article supplement (PMC3035126)

Figure S1

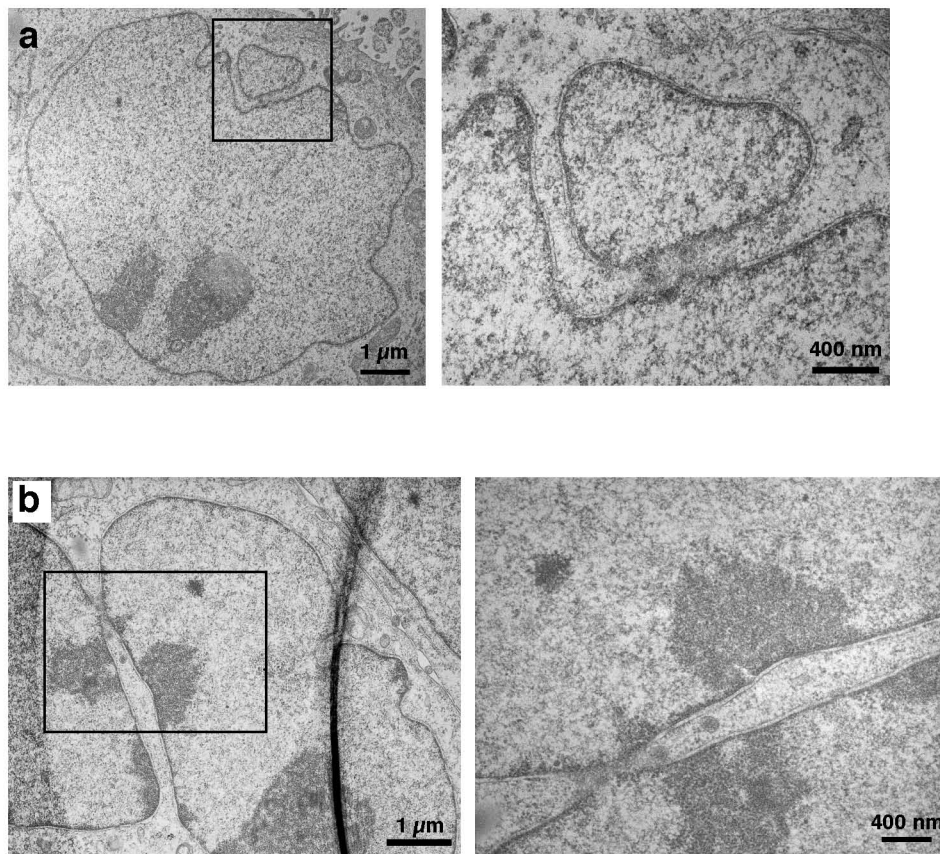

**Figure S2**

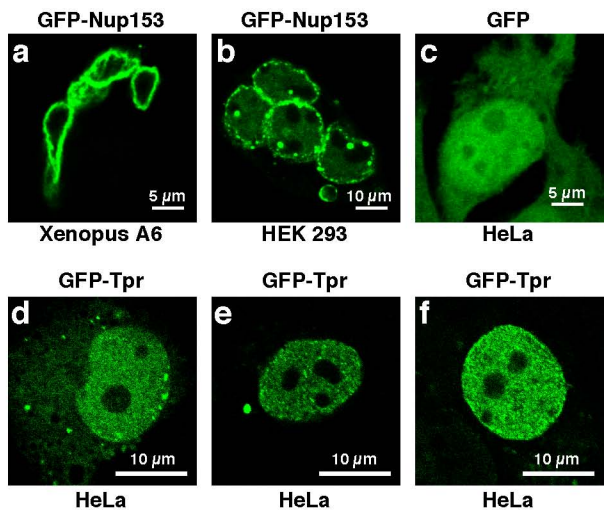

Figure S3

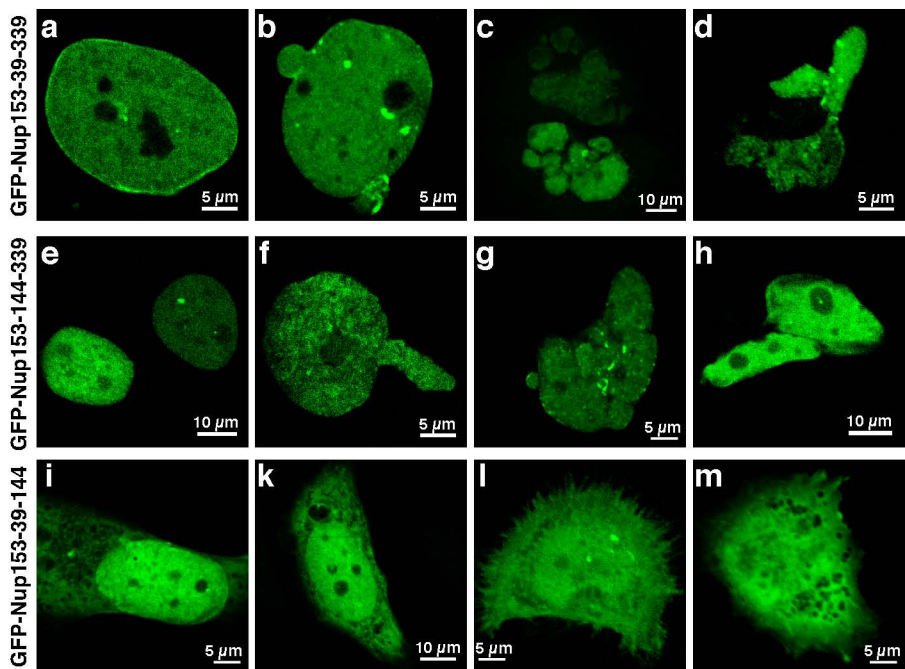

**a**

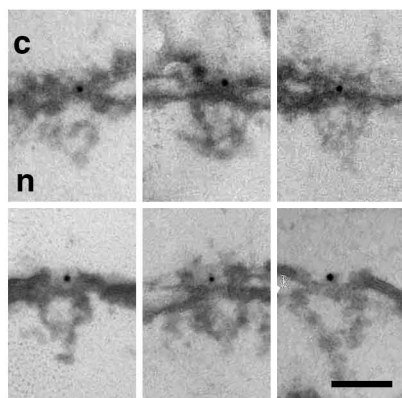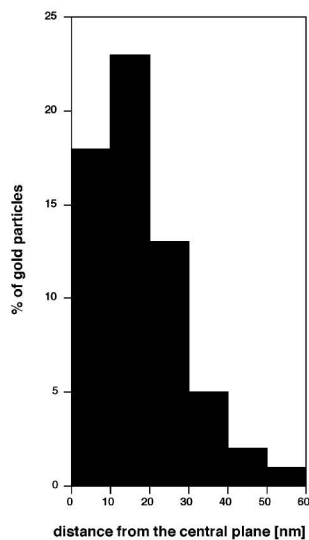

**b**

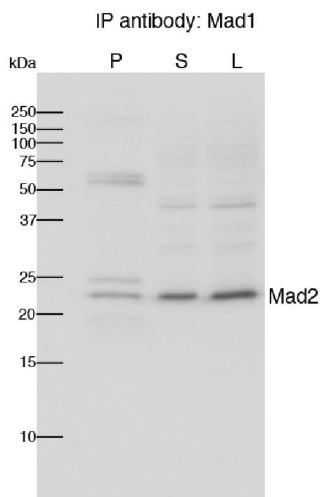

**c**

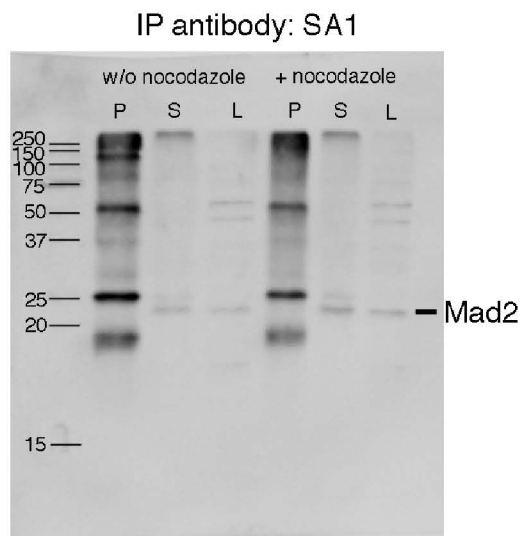

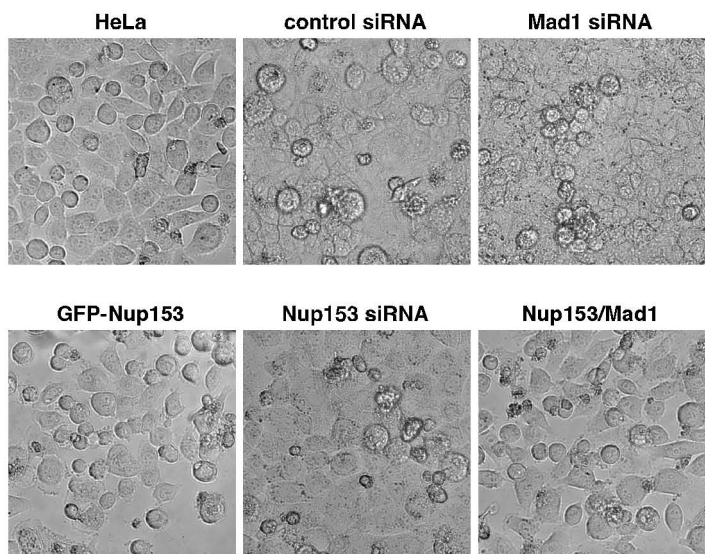

Figure S6

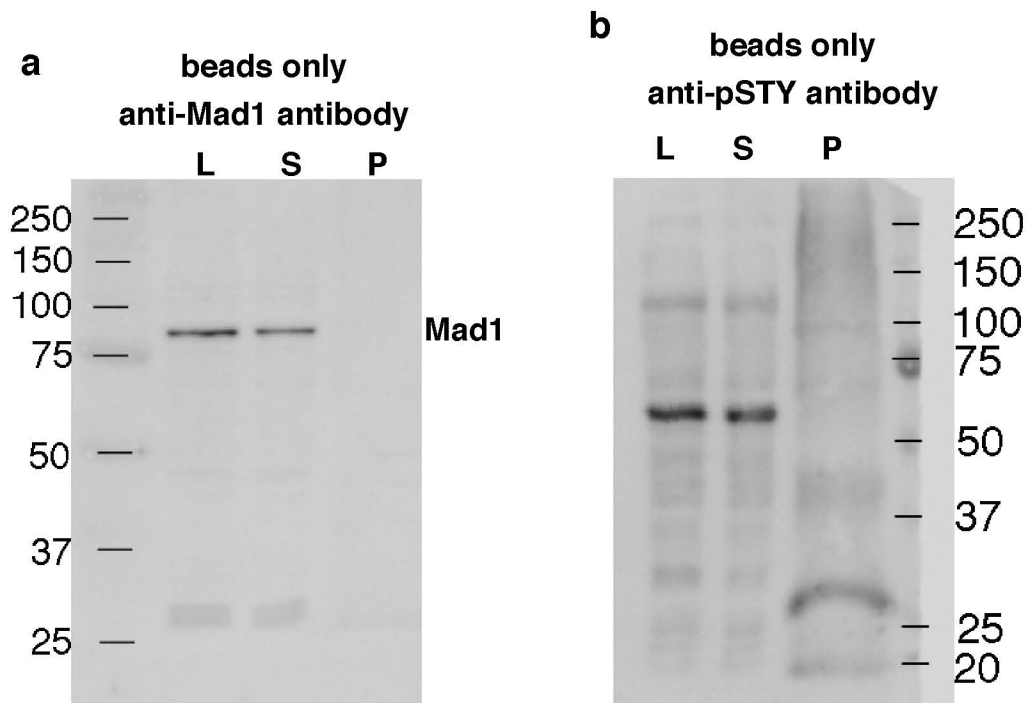

Figure S7

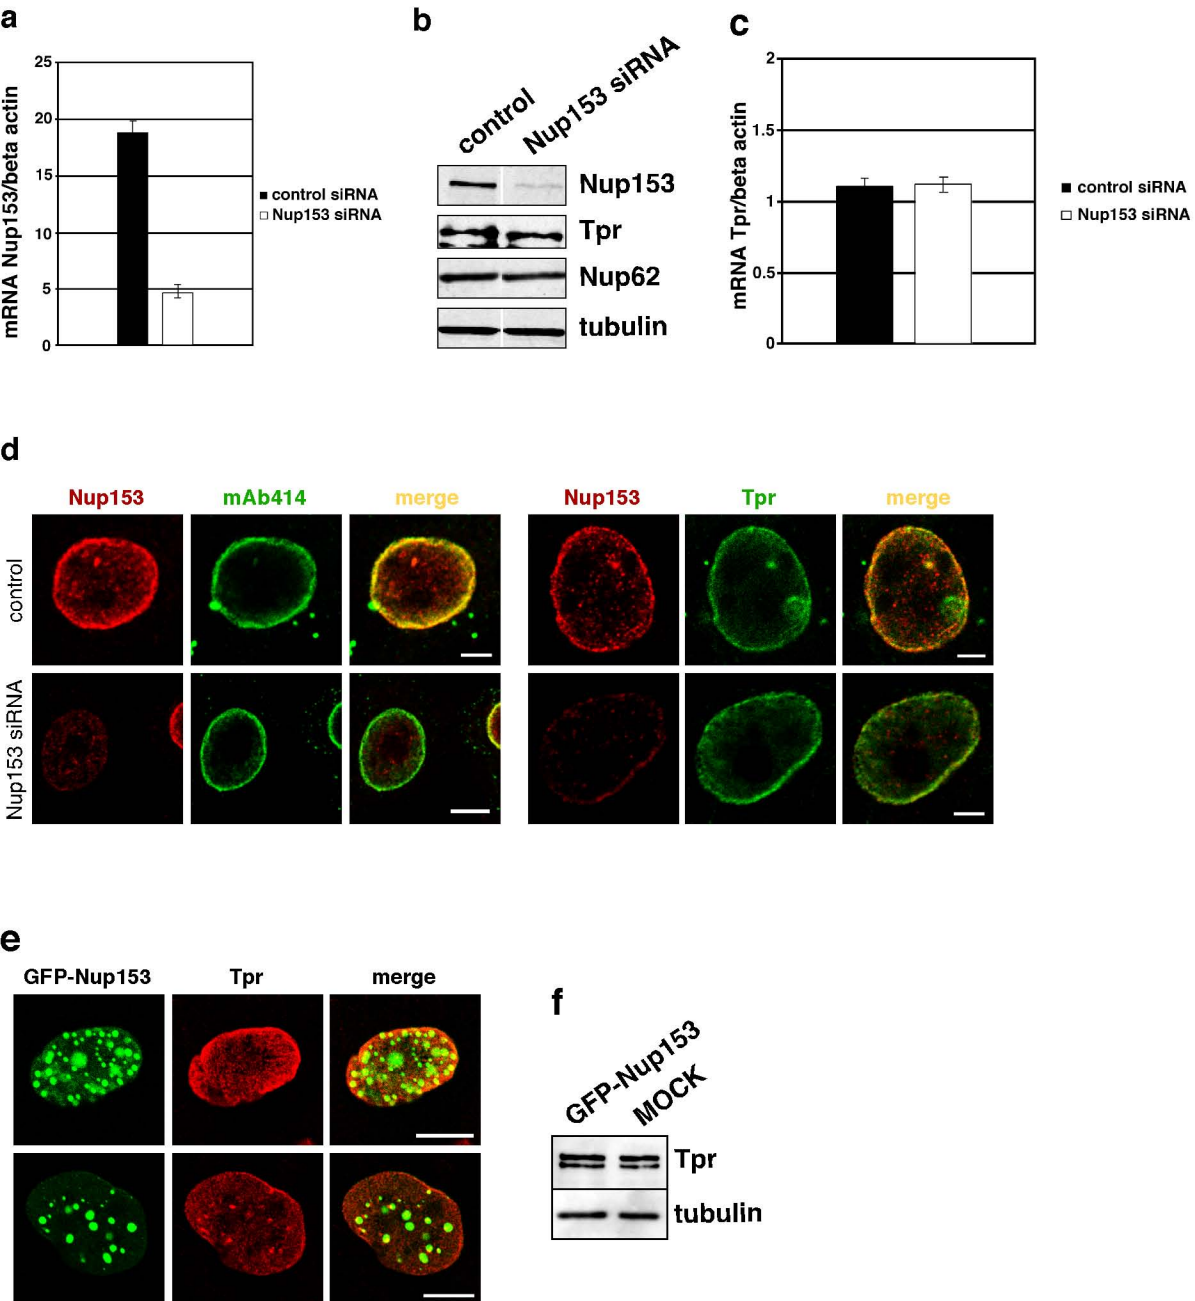

**a**

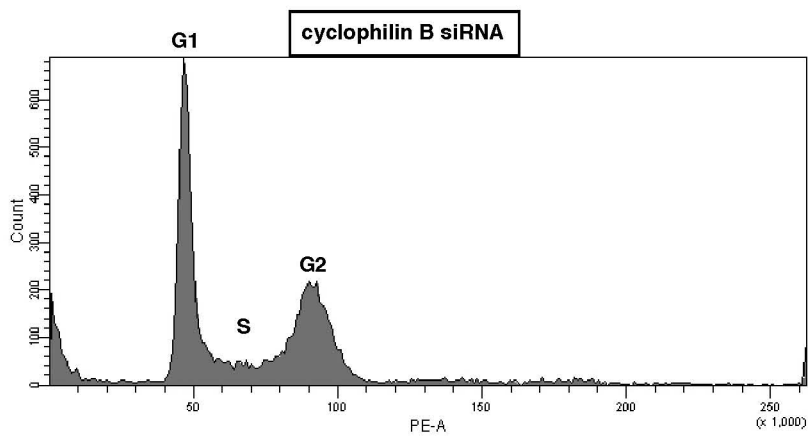

**b**

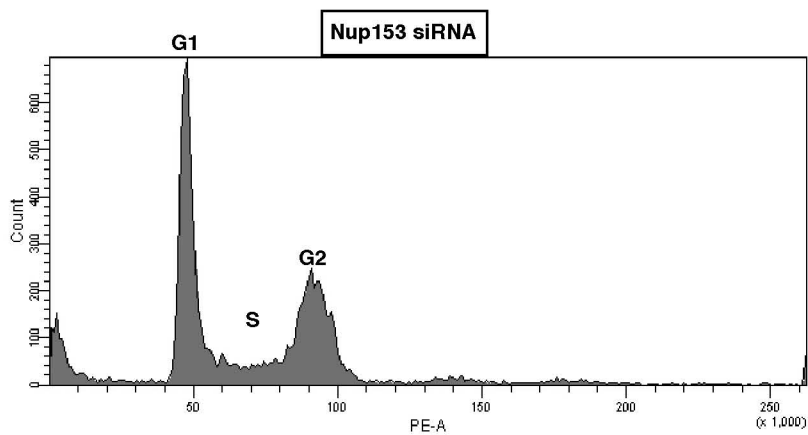

Supplement: nucl0101_0071SD1.pdf [file nucl0101_0071SD1.pdf]
